# Supplementary material
Source: PubMed Central journal article supplement (PMC8953538)
Supplement: NIHMS1759828-supplement-1759828_Sup_Tabs_and_Figs.pdf [file NIHMS1759828-supplement-1759828_Sup_Tabs_and_Figs.pdf]

## SUPPLEMENTAL TABLES AND FIGURES

**Table S1.** gRNA targeting sequences to introns 1 and 6. The score indicated was calculated by the Zhang Lab algorithm for cutting efficiency and offsite targeting [1].

| Target Location | Sequence             | Score |
|-----------------|----------------------|-------|
| Intron 1        | AAAACATAGCAGGGATCCGC | 84    |
| Intron 1        | ACAGAAGGGGTCTTTCAATC | 78    |
| Intron 1        | CCAGTGCTCAGCAATTATGG | 76    |
| Intron 6        | TAGCCGTGCTTCGTATTTCA | 85    |
| Intron 6        | ATTCTTTTTAGGAGGCACGT | 80    |
| Intron 6        | ACTCCTTGAAATACGAAGCA | 79    |

**Table S2.** Genotyping and sequencing primers

| Primer                                  | Sequence             | PCR fragment length, bp                                |
|-----------------------------------------|----------------------|--------------------------------------------------------|
| Forward 1, common                       | TGCAGGCTAACGTTTTCTCA |                                                        |
| Reverse 1, <i>Col1a2</i> <sup>GFP</sup> | AGTCGTGCTGCTTCATGTGG | 648                                                    |
| Reverse 2, <i>Col1a2</i>                | CCTCCCCAGAAATGACACC  | 517                                                    |
| Reverse 3, <i>Col1a2</i> indels         | CCCGGATTCTCCTGTTATGA | 1611 (GFP), 4932 (uncut),<br>~470 (exon 2-6 excision)  |
| *Forward 2 for Reverse 3                | TTGGGGGAAAGGGCTAAGTC | 4641 (GFP), 7962 (uncut),<br>~2500 (exon 2-6 excision) |

\*Forward 2 primer was used in early genotyping experiments (Fig. S1b)

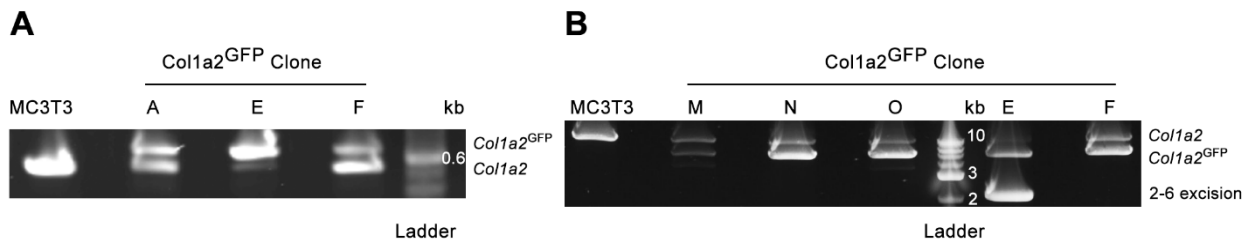

**Fig.S1.** Sample genotyping gels. **a** 2:1:1 mix of Forward-1:Reverse-1:Reverse-2 primers. **b** 1:1 mix of Forward-2:Reverse-3 primers. Clone M did not survive freezing; clones N and O did not mineralize and were discarded. Bottom band in clone E results from exon 2-6 excision.

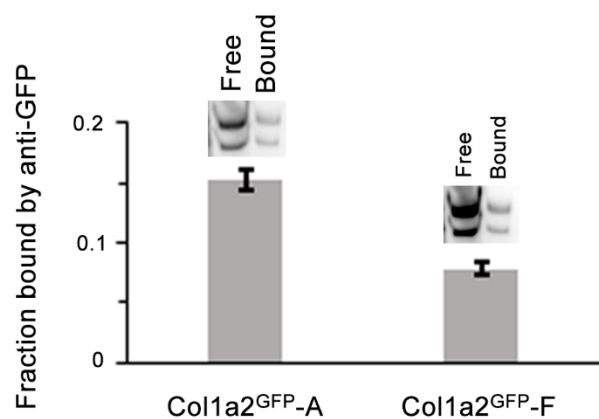

**Fig. S2.** Fraction of secreted procollagen containing the GFP-proc2(I) chain. Secreted procollagen was precipitated with 0.178 mg/ml ammonium sulfate, resuspended in bead buffer (10 mM Tris/Cl pH 7.5, 0.5 M NaCl, 0.5 mM EDTA) and incubated with anti-GFP agarose beads (Chromotek). After separating the free and bound fractions, collagen triple helices were isolated by pepsin treatment and selective NaCl precipitation, labeled by Cy5 and quantified by SDS-PAGE (insets). Error bars represent standard error of the mean in 3 biological replicates.

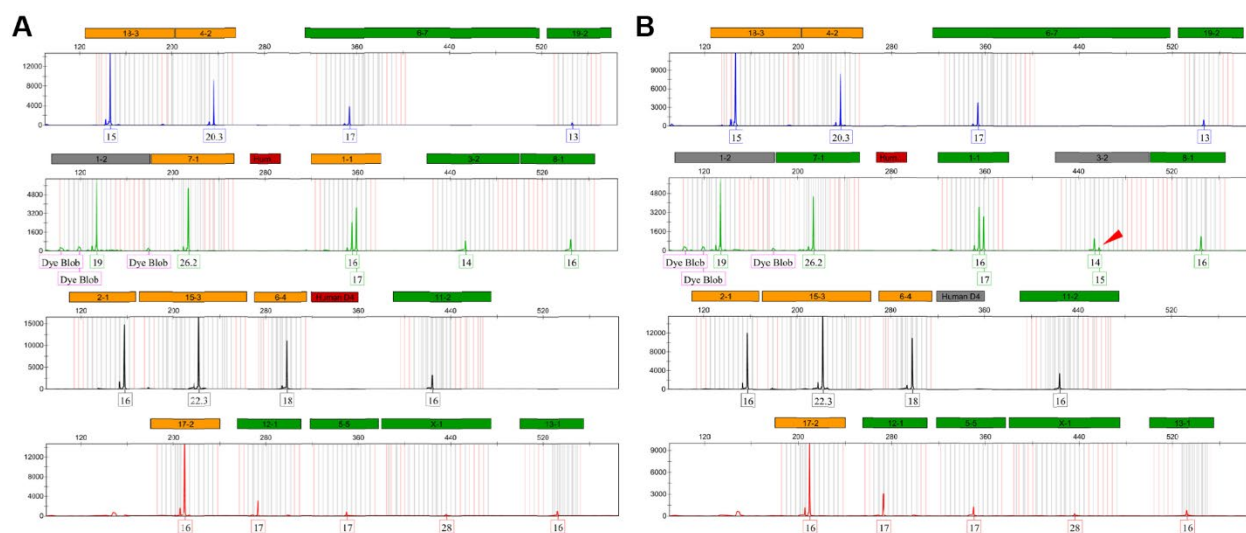

**Fig. S3.** STR profile reports from ATCC. **a** Col1a2<sup>GFP-A</sup>, 100% identical to MC3T3-E1 (subclone 4). **b** Col1a2<sup>GFP-F</sup>, 97% identical to MC3T3-E1 (subclone 4) and clone A. Red arrowhead shows a small satellite STR allele peak at locus 3-2, which distinguishes this clone.

## REFERENCES

1. Liu G, Zhang Y, Zhang T (2020) Computational approaches for effective CRISPR guide RNA design and evaluation. Computational and Structural Biotechnology Journal 18:35-44. <https://doi.org/10.1016/j.csbj.2019.11.006>
